# Supplementary material
Source: PubMed Central journal article supplement (PMC9724988)
Supplement: EIJ-D-20-00941_Kwon_SD.pdf [file EIJ-D-20-00941_Kwon_SD.pdf]

**Supplementary data**

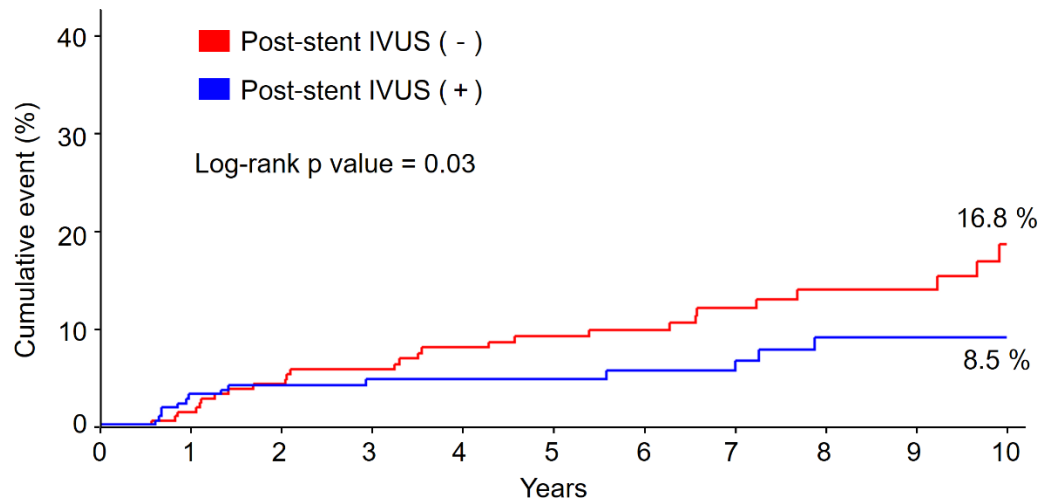

**Number at risk**

|                       |     |     |     |     |     |     |     |     |     |    |    |
|-----------------------|-----|-----|-----|-----|-----|-----|-----|-----|-----|----|----|
| ■ Post-stent IVUS (-) | 239 | 222 | 206 | 190 | 171 | 158 | 139 | 121 | 102 | 78 | 55 |
| ■ Post-stent IVUS (+) | 239 | 219 | 209 | 166 | 143 | 124 | 108 | 97  | 76  | 62 | 41 |

**Supplementary Figure 1.** Kaplan-Meier curves for target lesion revascularisation/reocclusion in the propensity score-matched population.

IVUS: intravascular ultrasound

**Supplementary Table 1. Standardised effect size of clinically relevant variables between the treatment groups before and after weighting.**

| <b>Clinical variables</b>                       | Unweighted | Weighted | <b>Lesion or procedural variables</b> | Unweighted | Weighted |
|-------------------------------------------------|------------|----------|---------------------------------------|------------|----------|
| <b>Age</b>                                      | 0.039      | 0.055    | <b>Target CTO location</b>            | 0.339      | 0.017    |
| <b>Sex</b>                                      | 0.077      | 0.042    | <b>In-stent restenosis</b>            | 0.187      | 0.028    |
| <b>Body mass index, kg/m<sup>2</sup></b>        | 0.024      | 0.091    | <b>Multivessel disease</b>            | 0.038      | 0.032    |
| <b>Hypertension</b>                             | 0.119      | 0.049    | <b>Japanese CTO score</b>             | 0.060      | 0.089    |
| <b>Diabetes mellitus</b>                        | 0.032      | 0.014    | <b>Retrograde attempt</b>             | 0.096      | 0.104    |
| <b>Insulin use</b>                              | 0.060      | 0.105    | <b>Total CTO length, mm</b>           | 0.123      | 0.097    |
| <b>Hyperlipidaemia</b>                          | 0.116      | 0.036    | <b>Total lesion length, mm</b>        | 0.059      | 0.009    |
| <b>Current smoker</b>                           | 0.128      | 0.059    | <b>Stent type generation</b>          | 0.417      | 0.031    |
| <b>History of myocardial infarction</b>         | 0.024      | 0.058    | <b>Number of stents per lesion</b>    | 0.104      | 0.038    |
| <b>Prior percutaneous coronary intervention</b> | 0.053      | 0.067    | <b>Stent length per lesion, mm</b>    | 0.037      | 0.035    |

|                                              |       |       |                                   |       |       |
|----------------------------------------------|-------|-------|-----------------------------------|-------|-------|
| <b>Prior coronary artery bypass grafting</b> | 0.165 | 0.005 | <b>Average stent diameter, mm</b> | 0.372 | 0.060 |
| <b>Renal dysfunction</b>                     | 0.133 | 0.019 |                                   |       |       |
| <b>History of stroke</b>                     | 0.103 | 0.100 |                                   |       |       |
| <b>Peripheral artery disease</b>             | 0.011 | 0.053 |                                   |       |       |
| <b>Atrial fibrillation</b>                   | 0.012 | 0.028 |                                   |       |       |
| <b>Left ventricular ejection fraction, %</b> | 0.068 | 0.003 |                                   |       |       |
| <b>Clinical diagnosis</b>                    | 0.029 | 0.039 |                                   |       |       |

CTO: chronic total occlusion

**Supplementary Table 2. Univariate Cox proportional hazards regression to identify predictors of target lesion revascularisation/reocclusion.**

|                                  | HR   | 95% CI    | <i>p</i> -value |
|----------------------------------|------|-----------|-----------------|
| <b>Clinical factors</b>          |      |           |                 |
| Age                              | 0.98 | 0.96-1.01 | 0.13            |
| Sex (male)                       | 1.05 | 0.57-1.95 | 0.87            |
| Hypertension                     | 1.46 | 0.89-2.38 | 0.13            |
| Diabetes mellitus                | 0.92 | 0.56-1.53 | 0.76            |
| Hyperlipidaemia                  | 1.02 | 0.62-1.68 | 0.95            |
| Renal insufficiency              | 0.60 | 0.01-73.3 | 0.42            |
| History of myocardial infarction | 0.58 | 0.23-1.43 | 0.24            |
| Clinical diagnosis (ACS)         | 1.13 | 0.67-1.92 | 0.65            |
| Ejection fraction                | 1.00 | 0.97-1.03 | 0.95            |
| <b>Procedural factors</b>        |      |           |                 |
| In-stent restenosis              | 1.56 | 0.82-2.96 | 0.17            |
| J-CTO score                      | 1.26 | 1.02-1.55 | 0.03            |
| Stent lengths                    | 1.01 | 1.00-1.02 | 0.01            |
| Stent numbers                    | 1.53 | 1.18-1.98 | 0.001           |
| First-generation stent           | 1.19 | 0.16-8.83 | 0.87            |
| Adjunctive post-dilatation       | 1.02 | 0.64-1.62 | 0.94            |
| Final balloon size, mm           | 0.88 | 0.54-1.42 | 0.59            |
| Maximal inflation pressure, atm  | 0.98 | 0.93-1.03 | 0.41            |
| <b>IVUS parameters</b>           |      |           |                 |
| Proximal segments                |      |           |                 |
| MLA                              | 0.95 | 0.87-1.04 | 0.25            |
| EEM area at MLA site             | 0.99 | 0.94-1.04 | 0.67            |
| Maximal plaque burden            | 1.03 | 1.00-1.06 | 0.05            |
| In-stent segments                |      |           |                 |

|                                                      |      |            |       |
|------------------------------------------------------|------|------------|-------|
| MSA                                                  | 0.75 | 0.62-0.91  | 0.004 |
| EEM at MSA                                           | 0.96 | 0.90-1.02  | 0.20  |
| PB at MSA                                            | 1.00 | 0.98-1.03  | 0.87  |
| Distal segments                                      |      |            |       |
| MLA                                                  | 1.03 | 0.91-1.15  | 0.68  |
| EEM area at MLA site                                 | 0.97 | 0.90-1.04  | 0.36  |
| Maximal PB                                           | 0.99 | 0.97-1.01  | 0.17  |
| Edge dissection                                      | 0.57 | 0.18-1.84  | 0.35  |
| Malapposition                                        | 1.09 | 0.47-2.43  | 0.84  |
| Haematoma                                            | 1.44 | 0.35-5.96  | 0.61  |
| False lumen involvement                              | 8.15 | 1.97-33.72 | 0.004 |
| MSA greater than MLA at the distal reference segment | 0.67 | 0.36-1.25  | 0.21  |
| Degree of stent expansion*                           | 1.26 | 0.61-2.57  | 0.53  |

---

\* Degree of stent expansion was defined as the minimal stent area divided by the mean of the proximal and distal reference lumen areas.

ACS: acute coronary syndrome; EEM: external elastic membrane; HR: hazard ratio; IVUS: intravascular ultrasound; J-CTO: Japanese chronic total occlusion; MLA: minimal lumen area; MSA: minimal stent area; PB: plaque burden

**Supplementary Table 3. In-hospital outcomes.**

| Total cases<br>(N=1,077)                 | Post-IVUS<br>not done<br>(n=239) | Post-IVUS<br>done<br>(n=838) | <i>p</i> -value |
|------------------------------------------|----------------------------------|------------------------------|-----------------|
| In-hospital MACCE                        | 6 (2.5)                          | 18 (2.1)                     | 0.80            |
| Death                                    | 0 (0.0)                          | 0 (0.0)                      | >0.99           |
| Procedure-related myocardial infarction  | 6 (2.5)                          | 16 (1.9)                     | 0.60            |
| Urgent repeat revascularisation          | 0 (0.0)                          | 1 (0.1)                      | >0.99           |
| Cardiac tamponade requiring intervention | 0 (0.0)                          | 1 (0.1)                      | >0.99           |
| Stroke                                   | 0 (0.0)                          | 1 (0.1)                      | >0.99           |
| Contrast-induced nephropathy             | 2 (0.8)                          | 3 (0.4)                      | 0.32            |

Values are numbers (%).

Contrast-induced nephropathy is defined as an elevation of serum creatinine of more than 25% or  $\geq 0.5$  mg/dl from baseline within 48 hours.

IVUS: intravascular ultrasound; MACCE: major adverse cardiac and cerebrovascular events

**Supplementary Table 4. Comparison of clinical outcomes between subjects with and those without post-stent intravascular ultrasound.**

|                            | Unweighted population             |                                   |                 |              |           |                 | Weighted population               |                                   |                 |              |           |                 |
|----------------------------|-----------------------------------|-----------------------------------|-----------------|--------------|-----------|-----------------|-----------------------------------|-----------------------------------|-----------------|--------------|-----------|-----------------|
|                            | Event number (%)                  |                                   |                 | Cox analysis |           |                 | Event number (%)                  |                                   |                 | Cox analysis |           |                 |
|                            | Post-stent<br>IVUS (+)<br>(n=838) | Post-stent<br>IVUS (-)<br>(n=239) | <i>p</i> -value | HR           | 95% CI    | <i>p</i> -value | Post-stent<br>IVUS (+)<br>(n=840) | Post-stent<br>IVUS (-)<br>(n=241) | <i>p</i> -value | HR           | 95% CI    | <i>p</i> -value |
| All-cause mortality        | 77 (14.9)                         | 38 (21.1)                         | 0.05            | 0.67         | 0.45-0.98 | 0.04            | 84.9 (16.8)                       | 35.4 (21.1)                       | 0.04            | 0.72         | 0.48-1.06 | 0.09            |
| Non-CV death               | 24 (4.2)                          | 5 (2.4)                           | 0.43            | 1.47         | 0.56-3.86 | 0.43            | 26.7 (4.5)                        | 9.8 (4.4)                         | 0.43            | 0.78         | 0.38-1.63 | 0.51            |
| CV death                   | 53 (11.2)                         | 33 (19.2)                         | 0.01            | 0.55         | 0.35-0.85 | 0.01            | 56.0 (11.6)                       | 24.5 (15.6)                       | 0.01            | 0.69         | 0.43-1.11 | 0.13            |
| Target vessel MI           | 25 (3.5)                          | 12 (6.7)                          | 0.17            | 0.62         | 0.31-1.24 | 0.18            | 24.4 (3.4)                        | 9.0 (5.2)                         | 0.17            | 0.79         | 0.37-1.69 | 0.54            |
| Periprocedural MI          | 16 (1.9)                          | 6 (2.5)                           | 0.56            | 0.76         | 0.60-1.94 | 0.56            | 15.7 (1.9)                        | 4.3 (1.8)                         | 0.56            | 1.05         | 0.36-3.07 | 0.92            |
| Spontaneous MI             | 9 (1.6)                           | 6 (4.1)                           | 0.16            | 0.49         | 0.17-1.37 | 0.17            | 8.7 (1.5)                         | 4.7 (3.4)                         | 0.16            | 0.55         | 0.18-1.69 | 0.30            |
| TVR/reocclusion            | 53 (10.4)                         | 28 (17.2)                         | 0.03            | 0.60         | 0.38-0.96 | 0.03            | 54.1 (10.2)                       | 28.1 (19.1)                       | 0.03            | 0.56         | 0.36-0.89 | 0.01            |
| TLR/reocclusion            | 49 (9.7)                          | 27 (16.8)                         | 0.02            | 0.58         | 0.36-0.93 | 0.02            | 50.6 (9.6)                        | 27.4 (18.9)                       | 0.02            | 0.54         | 0.34-0.86 | 0.01            |
| Stent thrombosis, definite | 10 (1.8)                          | 5 (2.5)                           | 0.37            | 0.62         | 0.21-1.80 | 0.38            | 11.1 (2.0)                        | 5.3 (2.5)                         | 0.37            | 0.60         | 0.21-1.71 | 0.34            |

Cumulative incidences of events are presented as Kaplan-Meier estimates.

CI: confidence interval; CV: cardiovascular; HR: hazard ratio; MI: myocardial infarction; TLR: target lesion revascularisation; TVR: target vessel revascularisation

**Supplementary Table 5. Comparison of clinical outcomes between subjects with and those without post-stent intravascular ultrasound using propensity score-matching method.**

|                            | Cox analysis |           |                 |
|----------------------------|--------------|-----------|-----------------|
|                            | HR           | 95% CI    | <i>p</i> -value |
| All-cause mortality        | 0.67         | 0.45-0.98 | 0.04            |
| Non-CV death               | 1.47         | 0.56-3.86 | 0.43            |
| CV death                   | 0.55         | 0.35-0.85 | 0.01            |
| Target vessel MI           | 0.62         | 0.31-1.24 | 0.18            |
| Periprocedural MI          | 0.76         | 0.60-1.94 | 0.56            |
| Spontaneous MI             | 0.49         | 0.17-1.37 | 0.17            |
| TVR/reocclusion            | 0.60         | 0.38-0.96 | 0.03            |
| TLR/reocclusion            | 0.58         | 0.36-0.93 | 0.02            |
| Stent thrombosis, definite | 0.62         | 0.21-1.80 | 0.38            |

CI: confidence interval; CV: cardiovascular; HR: hazard ratio; MI: myocardial infarction; TLR: target lesion revascularisation; TVR: target vessel revascularisation



**Supplementary Table 6. Post-stenting intravascular ultrasound findings.**

|                                                      | Total population<br>(N=723) | TLR/reocclusion<br>(-)<br>(n=677) | TLR/reocclusion<br>(+)<br>(n=46) | <i>p</i> -value |
|------------------------------------------------------|-----------------------------|-----------------------------------|----------------------------------|-----------------|
| <b>Proximal reference segments</b>                   |                             |                                   |                                  |                 |
| MLA                                                  | 9.5±3.6                     | 9.5±3.6                           | 8.7±3.2                          | 0.11            |
| EEM area at MLA site, mm <sup>2</sup>                | 19.7±5.8                    | 19.7±5.8                          | 19.0±5.5                         | 0.40            |
| Maximum plaque burden                                | 51.9±10.9                   | 51.7±11.0                         | 55.1±11.1                        | 0.06            |
| <b>In-stent segments</b>                             |                             |                                   |                                  |                 |
| MSA                                                  |                             | 5.5±1.8                           | 4.6±1.2                          | 0.001           |
| EEM area at MLA site, mm <sup>2</sup>                |                             | 11.8±4.9                          | 10.7±4.7                         | 0.13            |
| Plaque burden at MSA                                 |                             | 50.4±11.7                         | 51.0±15.0                        | 0.78            |
| <b>Distal reference segments</b>                     |                             |                                   |                                  |                 |
| MLA                                                  | 4.5±2.5                     | 4.5±2.4                           | 4.7±3.3                          | 0.78            |
| EEM area at MLA site, mm <sup>2</sup>                | 9.0±4.7                     | 9.2±4.7                           | 8.2±5.3                          | 0.34            |
| Maximum plaque burden                                | 47.4±15.1                   | 47.7±15.0                         | 43.7±17.0                        | 0.14            |
| Edge dissection                                      | 78 (7.2)                    | 75 (11.1)                         | 3 (6.5)                          | 0.34            |
| Malapposition                                        | 105 (9.7)                   | 98 (14.5)                         | 7 (15.2)                         | 0.89            |
| Haematoma                                            | 21 (1.9)                    | 19 (2.8)                          | 2 (4.3)                          | 0.64            |
| False lumen involvement                              | 5 (0.5)                     | 3 (0.4)                           | 2 (4.3)                          | 0.04            |
| MSA greater than MLA at the distal reference segment | 568 (52.7)                  | 536 (79.2)                        | 32 (69.6)                        | 0.12            |
| Degree of stent expansion*                           | 0.95±0.40                   | 0.95±0.36                         | 0.98±0.80                        | 0.80            |

\* Degree of stent expansion was defined as the minimal stent area divided by the mean of the proximal and distal reference lumen areas.

EEM: external elastic membrane; MLA: minimal lumen area; MSA: minimal stent area; TLR: target lesion revascularisation

**Supplementary Table 7. Cox proportional hazards regression to identify predictors of target lesion revascularisation/reocclusion.**

|                                               | Univariate |            |                 | Multivariate |           |                 |
|-----------------------------------------------|------------|------------|-----------------|--------------|-----------|-----------------|
|                                               | HR         | 95% CI     | <i>p</i> -value | HR           | 95% CI    | <i>p</i> -value |
| <b>Clinical or procedural factors</b>         |            |            |                 |              |           |                 |
| Age                                           | 0.98       | 0.96-1.01  | 0.13            |              |           |                 |
| Hypertension                                  | 1.46       | 0.89-2.38  | 0.13            |              |           |                 |
| In-stent restenosis                           | 1.56       | 0.82-2.96  | 0.17            |              |           |                 |
| J-CTO score                                   | 1.26       | 1.02-1.55  | 0.03            |              |           |                 |
| Stent lengths                                 | 1.01       | 1.00-1.02  | 0.01            |              |           |                 |
| Stent numbers                                 | 1.53       | 1.18-1.98  | 0.001           |              |           |                 |
| <b>IVUS parameters</b>                        |            |            |                 |              |           |                 |
| Maximal plaque burden at the proximal segment | 1.03       | 1.00-1.06  | 0.05            |              |           |                 |
| MSA                                           | 0.75       | 0.62-0.91  | 0.004           | 0.78         | 0.64-0.95 | 0.01            |
| EEM at MSA                                    | 0.96       | 0.90-1.02  | 0.20            |              |           |                 |
| Maximal plaque burden at the distal segment   | 0.99       | 0.97-1.01  | 0.17            |              |           |                 |
| False lumen involvement                       | 8.15       | 1.97-33.72 | 0.004           |              |           |                 |

Cox proportional hazards regression analysis was performed using conventional cardiovascular risk factors, and intravascular ultrasound parameters, with  $p \leq 0.2$ .

EEM: external elastic membrane; HR: hazard ratio; IVUS: intravascular ultrasound; J-CTO: Japanese chronic total occlusion; MSA: minimal stent area
